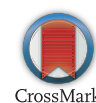

# Professional Practice Committee for the *Standards of Medical Care in Diabetes—2015*

*Diabetes Care* 2015;38(Suppl. 1):S88–S89 | DOI: 10.2337/dc15-S018

**Committee members disclosed the following financial or other conflicts of interest covering the period 12 months before 7 September 2014**

| Member                                       | Employment                                                                                                                                                   | Research grant                                                                  | Other research support                                                         |
|----------------------------------------------|--------------------------------------------------------------------------------------------------------------------------------------------------------------|---------------------------------------------------------------------------------|--------------------------------------------------------------------------------|
| Richard W. Grant, MD, MPH (Chair)            | Division of Research, Kaiser Permanente, Oakland, CA                                                                                                         | NIDDK, NHLBI                                                                    | None                                                                           |
| Thomas W. Donner, MD                         | Johns Hopkins University School of Medicine, Baltimore, MD                                                                                                   | Novo Nordisk**                                                                  | None                                                                           |
| Judith E. Fradkin, MD                        | National Institutes of Health, Bethesda, MD                                                                                                                  | None                                                                            | None                                                                           |
| Charlotte Hayes, MMSc, MS, RD, CDE, ACSM CES | Private practice: (NF) <sup>2</sup> Nutrition and Fitness Consulting, Atlanta, GA                                                                            | None                                                                            | None                                                                           |
| William H. Herman, MD, MPH                   | University of Michigan, Ann Arbor, MI                                                                                                                        | None                                                                            | None                                                                           |
| William C. Hsu, MD                           | Joslin Diabetes Center, Boston, MA                                                                                                                           | None                                                                            | None                                                                           |
| Eileen Kim, MD                               | Kaiser Permanente Northern California Region, Oakland, CA                                                                                                    | None                                                                            | None                                                                           |
| Lori Laffel, MD, MPH                         | Joslin Diabetes Center and Harvard Medical School, Boston, MA                                                                                                | Dexcom, Boehringer Ingelheim                                                    | None                                                                           |
| Rodica Pop-Busui, MD, PhD                    | University of Michigan, Ann Arbor, MI                                                                                                                        | NHLBI, NIDDK, ADA, Bristol-Myers Squibb                                         | None                                                                           |
| Neda Rasouli, MD                             | University of Colorado, Denver, CO                                                                                                                           | Novo Nordisk, # Bristol-Myers Squibb, # Merck Sharp & Dohme, # NIDDK, # Pfizer# | None                                                                           |
| Desmond Schatz, MD                           | University of Florida, Gainesville, FL                                                                                                                       | None                                                                            | NIDDK, NIAID, Jaeb Center for Health Research, JDRF, Helmsley Charitable Trust |
| Joseph A. Stankaitis, MD, MPH                | Monroe Plan for Medical Care, Rochester, NY                                                                                                                  | Milbank Memorial Fund                                                           | None                                                                           |
| Tracey H. Taveira, PharmD, CDOE, CVDOE       | University of Rhode Island College of Pharmacy, Kingston, RI; Providence VA Medical Center, Warren Alpert Medical School of Brown University, Providence, RI | AHA                                                                             | None                                                                           |
| Deborah J. Wexler, MD                        | Massachusetts General Hospital, Boston, MA                                                                                                                   | NIDDK                                                                           | None                                                                           |
| Jane L. Chiang, MD (Staff)                   | ADA, Alexandria, VA                                                                                                                                          | None                                                                            | None                                                                           |
| Erika Gebel Berg, PhD (Staff)                | ADA, Alexandria, VA                                                                                                                                          | None                                                                            | None                                                                           |

ADA, American Diabetes Association; AHA, American Heart Association; MEDCAC, Medicare Evidence Development & Coverage Advisory Committee; NHLBI, National Heart, Lung, and Blood Institute; NIAID, National Institute of Allergy and Infectious Diseases; NIDDK, National Institute of Diabetes and Digestive and Kidney Diseases.

\*≥\$10,000 per year from company to individual.

#Grant or contract is to university or other employer.

| Member  | Speakers' bureau/<br>honoraria     | Ownership<br>interest | Consultant/advisory board                                                                                                                                   | Other                                                                                                                                                                                                                                                                                                                                                                 |
|---------|------------------------------------|-----------------------|-------------------------------------------------------------------------------------------------------------------------------------------------------------|-----------------------------------------------------------------------------------------------------------------------------------------------------------------------------------------------------------------------------------------------------------------------------------------------------------------------------------------------------------------------|
| R.W.G.  | None                               | None                  | None                                                                                                                                                        | None                                                                                                                                                                                                                                                                                                                                                                  |
| T.W.D.  | None                               | None                  | None                                                                                                                                                        | None                                                                                                                                                                                                                                                                                                                                                                  |
| J.E.F.  | None                               | None                  | None                                                                                                                                                        | None                                                                                                                                                                                                                                                                                                                                                                  |
| C.H.    | Scherer Clinical<br>Communications | None                  | Emory University, Emory Diabetes<br>Course at Grady, Team Novo Nordisk                                                                                      | Receives royalties from the ADA,<br>Academy of Nutrition and Dietetics<br>(Chair, Legislative and Public Policy<br>Committee)                                                                                                                                                                                                                                         |
| W.H.H.  | None                               | None                  | AstraZeneca, Novo Nordisk (self and<br>spouse), Merck Sharp & Dohme,* Gl<br>Dynamics, Boehringer Ingelheim                                                  | National Committee for Quality<br>Assurance (Chair, Diabetes Panel),<br>Centers for Medicare & Medicaid<br>Services (member, MEDCAC),<br><i>Diabetic Medicine</i> (Editor for the<br>Americas)                                                                                                                                                                        |
| W.C.H.  | None                               | None                  | Novo Nordisk                                                                                                                                                | None                                                                                                                                                                                                                                                                                                                                                                  |
| E.K.    | None                               | None                  | None                                                                                                                                                        | None                                                                                                                                                                                                                                                                                                                                                                  |
| L.L.    | None                               | None                  | Johnson & Johnson, Eli Lilly, Sanofi,<br>Bristol-Myers Squibb, Menarini,<br>Novo Nordisk, AstraZeneca, LifeScan/<br>Animas, Boehringer Ingelheim,<br>Dexcom | None                                                                                                                                                                                                                                                                                                                                                                  |
| R.P.-B. | None                               | None                  | Acorda Therapeutics, AstraZeneca,<br>T1D Exchange                                                                                                           | None                                                                                                                                                                                                                                                                                                                                                                  |
| N.R.    | None                               | None                  | None                                                                                                                                                        | None                                                                                                                                                                                                                                                                                                                                                                  |
| D.S.    | None                               | None                  | Daiichi Sankyo, Andromeda Biotech                                                                                                                           | ADA Board of Directors, ADA officer                                                                                                                                                                                                                                                                                                                                   |
| J.A.S.  | None                               | None                  | TPG National Payor Roundtable,<br>Amgen, Celgene, Gilead, Salix<br>Pharmaceuticals, Janssen<br>Pharmaceuticals, Bayer, Medtronic                            | National Committee for Quality<br>Assurance (physician surveyor and<br>member of Reconsideration<br>Committee), New York State<br>Department of Health Medicaid<br>Redesign Team's Evidence-Based<br>Benefit Review Workgroup, Board<br>member (Chair-Elect) for St. Ann's<br>Community, Rochester, NY, a non-<br>profit senior living/long-term care<br>organization |
| T.H.T.  | None                               | None                  | None                                                                                                                                                        | None                                                                                                                                                                                                                                                                                                                                                                  |
| D.J.W.  | None                               | None                  | None                                                                                                                                                        | <i>Diabetes Care</i> (Editorial Board)                                                                                                                                                                                                                                                                                                                                |
| J.L.C.  | None                               | None                  | None                                                                                                                                                        | None                                                                                                                                                                                                                                                                                                                                                                  |
| E.G.B.  | None                               | None                  | None                                                                                                                                                        | None                                                                                                                                                                                                                                                                                                                                                                  |
